# Supplementary material for: Adaptive Evolution and Environmental Durability Jointly Structure Phylodynamic Patterns in Avian Influenza Viruses
Source: PLoS Biol. 2014 Aug 12;12(8):e1001931. doi: 10.1371/journal.pbio.1001931 (PMC4130664; doi:10.1371/journal.pbio.1001931)
Supplement: Table S2 — Parameters of the model. Values displayed here are used throughout the manuscript, except when sensitivity of parameter is explored. NA, not applicable. (XLSX) [file pbio.1001931.s018.xlsx]

## Sheet: Sheet1
Parameter	Description	Units	Values (human, avian)	Reference
μ	Per capita host birth and death rates	year^-1	80,4
ρ	Environmental uptake rate	centiliter.day-1	NA,10^4-10^5	7,8
L	Lake volume	Centiliter	NA,10^4	9
κ	ID_50	virions	NA,10^2	8
1/ξ	Environmental durability	day	NA,20	5
β	Direct transmission rate	year^-1	0.000078,0.0078	9
c	Seasonal amplitude	NA	0,0.5	8
m	Non-neutral mutation rate	ind.day^-1	0.008,0.008	See below
ϒ	Infectious period	day^-1	5,5	10
ω	Excretion rate	virions.day^-1	NA,10^12	8
d	Cross-immunity parameter	dimensionless	3,3	See below
δt	Simulation time step	day	0.1,0.1	6
tMax	Simulation duration	year	50,50
